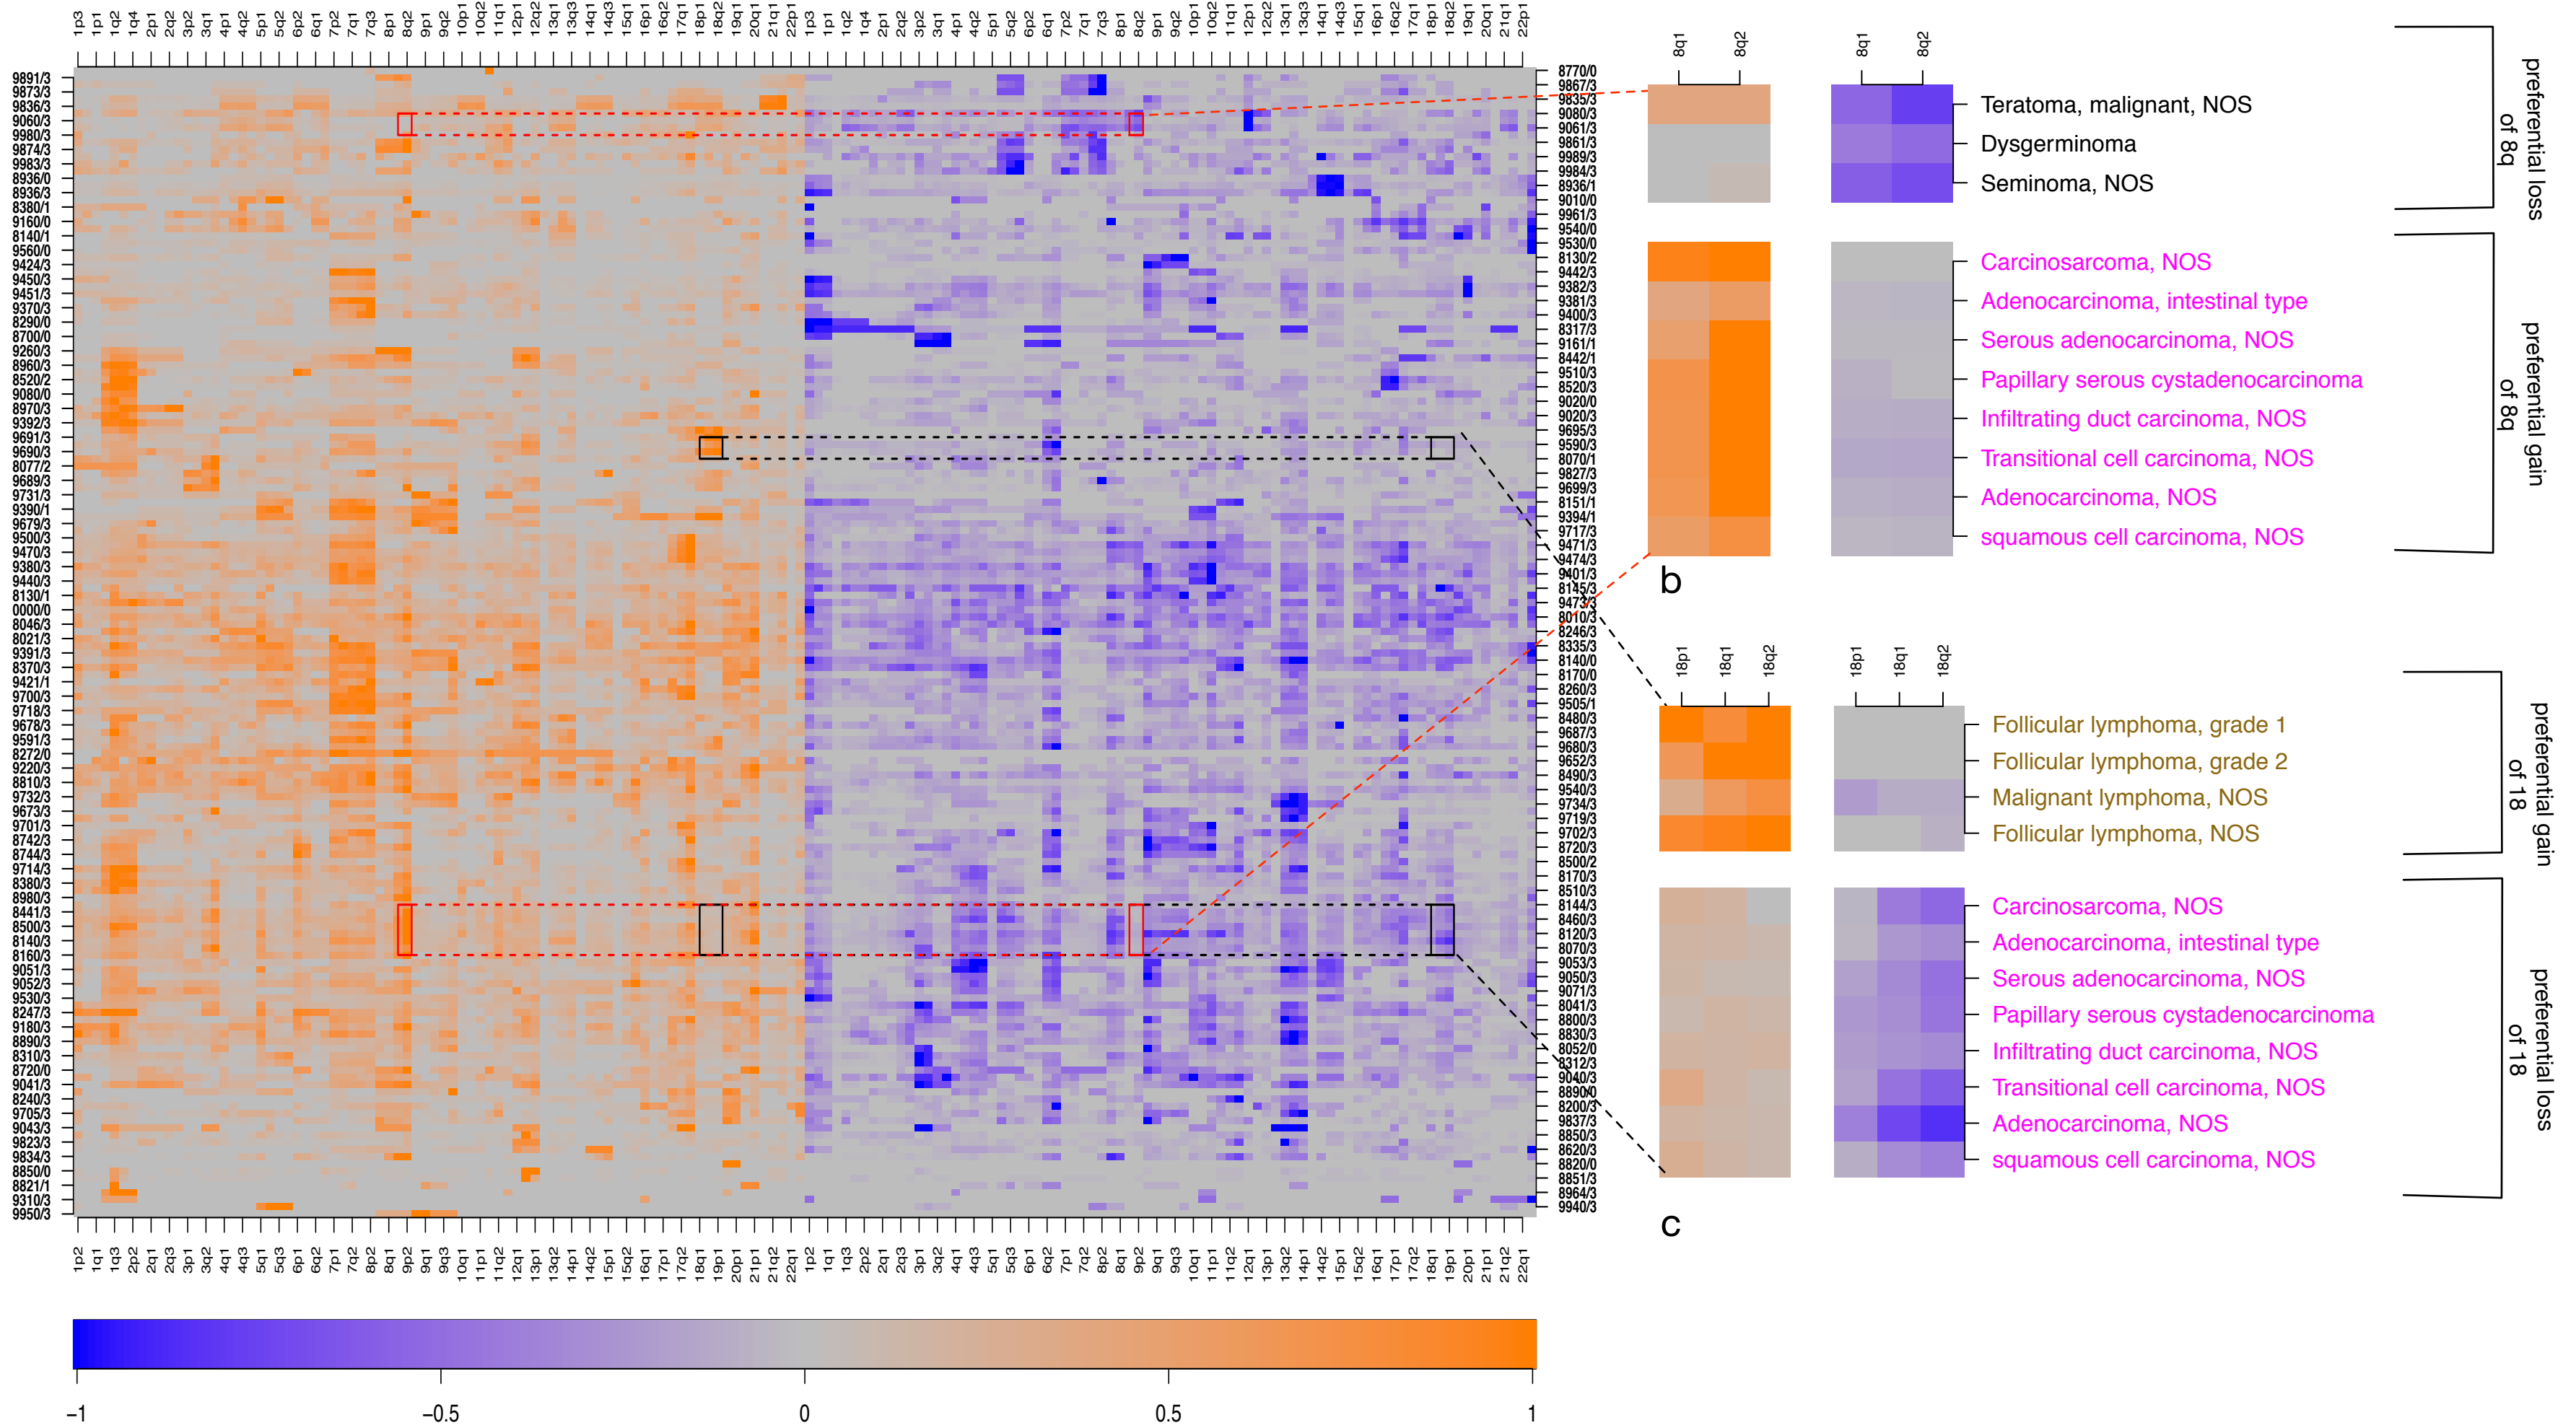

a

b

c

preferential loss  
of 8q

preferential gain  
of 8q

preferential gain  
of 18

preferential loss  
of 18

Teratoma, malignant, NOS  
Dysgerminoma  
Seminoma, NOS

Carcinosarcoma, NOS  
Adenocarcinoma, intestinal type  
Serous adenocarcinoma, NOS  
Papillary serous cystadenocarcinoma  
Infiltrating duct carcinoma, NOS  
Transitional cell carcinoma, NOS  
Adenocarcinoma, NOS  
squamous cell carcinoma, NOS

Follicular lymphoma, grade 1  
Follicular lymphoma, grade 2  
Malignant lymphoma, NOS  
Follicular lymphoma, NOS

Carcinosarcoma, NOS  
Adenocarcinoma, intestinal type  
Serous adenocarcinoma, NOS  
Papillary serous cystadenocarcinoma  
Infiltrating duct carcinoma, NOS  
Transitional cell carcinoma, NOS  
Adenocarcinoma, NOS  
squamous cell carcinoma, NOS

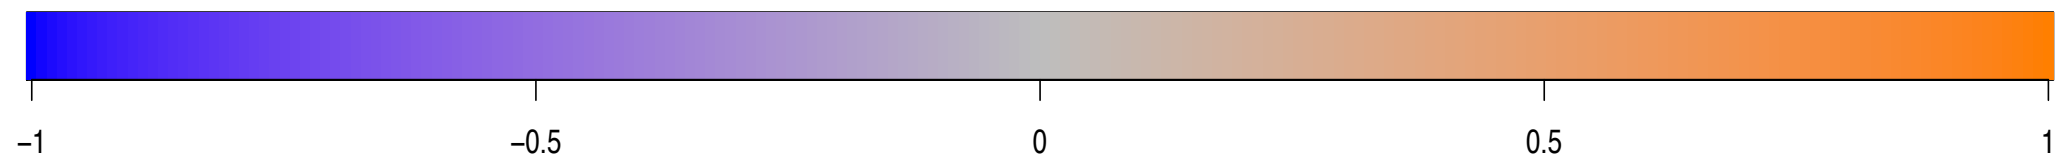

Source: https://storage.googleapis.com/plos-corpus-prod/10.1371/journal.pone.0043689/1/pone.0043689.s004.pdf?X-Goog-Algorithm=GOOG4-RSA-SHA256&X-Goog-Credential=wombat-sa%40plos-prod.iam.gserviceaccount.com%2F20210509%2Fauto%2Fstorage%2Fgoog4_request&X-Goog-Date=20210509T055402Z&X-Goog-Expires=3600&X-Goog-SignedHeaders=host&X-Goog-Signature=99ec79748c8c6c33bbadc5cf9bf5263edd73e16f86356da034f8022f3b6b11defd9093bd594ba07ee0f1a560d652c38c3e527e45656dd111dad426d166b85a479f074cae27ff2d877bf1798c456db2e2f19c592aa99b001b057ba8ef34ec3c646932946eb2ea8af2350d3e86c0595cf2a967f2d11f8dffc7576d9faf347c6e722c048171fe6baeb745a85941349558710f13a8afd8704e09c58369ef98c1109753889a52a5cc04f07f4f10100f892bbb01c5c1de346aa2e2ac931f8b8bfaee49cfd77cfbf46dbe9278d4d955ebe9a71dd5dfb806c6f7d6a612f785e30a3c81055f4ae126c36e619bebaf629906f427bdde68901e557a9ea4955309f936f783b4
